# Supplementary material for: Genome-wide identification and characterization of an amino acid permease gene family in Nicotiana tabacum
Source: Royal Society of Chemistry journal article supplement (doi:10.1039/c7ra05610a), 2017-01-01
Supplement: c7ra05610a1.pdf [file c7ra05610a1.pdf]

## Supporting Information

### Genome-wide identification and characterization of amino acid permease gene family in *Nicotiana tabacum*

Yingying Zhao<sup>a,b, §</sup>, Yalong Xu<sup>b, §</sup>, Zhong Wang<sup>b</sup>, Jianfeng Zhang<sup>b</sup>, Xia Chen<sup>b</sup>, Zhengfeng Li<sup>c</sup>, Zefeng Li<sup>b</sup>, Lifeng Jin<sup>b</sup>, Pan Wei<sup>b</sup>, Lin Zhang<sup>d</sup>,  
Xiaoquan Zhang<sup>d</sup>, Ran Wang<sup>b, \*</sup>, Fang Wei<sup>a, \*</sup>.

<sup>a</sup>. School of Life Sciences, Zhengzhou University, No.100 Science Road, Zhengzhou, Henan, 450001, China. Email: zyy244792855@163.com; fangwei@zzu.edu.cn

<sup>b</sup>. Zhengzhou Tobacco Research Institute of CNTC, No. 2 Fengyang Street, Zhengzhou, Henan, 450001, China. Email: xuyalong2007@163.com; zhongwang1123@126.com; zhangjianfeng\_83@outlook.com; chenxia0372@163.com; 379359757@qq.com; jin\_lf@126.com; weipan83 @126.com; wangr@ztri.com.cn

<sup>c</sup>. Technology Center, China Tobacco Yunnan Industrial Co., Ltd., Kunming, Yunnan, 650231, China. Email: 1208913744@qq.com

<sup>d</sup>. College of Tobacco Science, Henan Agricultural University, No.63 Agriculture Road, Zhengzhou, Henan, 450002, China. Email: hnndzhang@126.com, zxq013415@163.com

\*To whom correspondence should be addressed. §These authors contributed equally to this work.

Table S 1 Primers used in this research

| Primer set | Target gene | Upstream primer            | Downstream primer         |
|------------|-------------|----------------------------|---------------------------|
| 1          | Ntab0475230 | TACAGCAGTTATTGGTTCTGGAG    | AAGGAGCGCAGAAGTGTAGTAA    |
| 2          | Ntab0126970 | ACTATTGGACTAGGCTTAGGAGTT   | AACTGTTGTTACTGCTACACTAAT  |
| 3          | Ntab0329990 | TTGTTACTTATTACACTTCCGCT    | GATAGCAACTCCAAAAAGATTCG   |
| 4          | Ntab0126360 | TAACAGGGACGACAGTAGGAGTT    | CTTGCTTTCTGGAGGTTGTGAC    |
| 5          | Ntab0759460 | TTCCACCACAACCTTTATTCTATATT | AGAAAACCTGGTAAGCTCCAAT    |
| 6          | Ntab0648520 | ACTACAGTTACATGGAGGTTGTC    | ATAAGGGTAATTTGATACTGAGC   |
| 7          | Ntab0439400 | CGCTAACATTTGCATCGCTATT     | ACTATAACATATGCTGTCCTCCAC  |
| 8          | Ntab0331750 | TGATGGAGTAAATGGAGACACG     | CCCAATAAGTCCACAGAGCATG    |
| 9          | Ntab0821150 | TATGATAGCATTGGTGTCACTG     | AAGTTACAGTTCCAATATGTGTTAC |

---

|    |                            |                                                          |                                                         |
|----|----------------------------|----------------------------------------------------------|---------------------------------------------------------|
| 10 | Ntab0800540                | ATCAAAAGGAAACTGAGCCAAT                                   | AAAGCAAAAAGGATCATTACAGC                                 |
| 11 | NtAAP2-2-CDS               | ATGTTGCCAAGGAGTCGAACTCTTC                                | TTAGTAAATAGTCTTGAAAGGCTTATACGT<br>TTTG                  |
| 12 | NtAAP2-2-RNAi              | GGGGACCACTTTGTACAAGAAAGCTGGGTCTC<br>TACTGTTGGTCTTGTCTTGG | GGGGACAAGTTTGTACAAAAAAGCAGGCT<br>CGAGATTCCTGGAGCATCATCT |
| 13 | NtAAP2-2-OE                | CGAGGTACCATGTTGCCAAGGAGTCGAACTCT<br>TC                   | CCCACTAGTTTAGTAAATAGTCTTGAAAGG<br>CTTATACGTTTTG         |
| 14 | nppt                       | TCGCCGCCAAGCTCTTCAGCAAT                                  | GTGGAGAGGCTATTCGGCT ATGACT                              |
| 15 | Hyg                        | GTGCTTTCAGCTTCGATG                                       | AACCAAGCTCTGATAGAG                                      |
| 16 | NtAAP2-2 flanking-<br>Flag | GTTTACCAGCTTAACTTCTTTCGTGT                               | CTTATCGTCAT CGTCCTTGTAATCG                              |

---

Table S2 Three potential amino acid permease genes identified in tobacco which were removed

| Gene ID  | MW(   | PI  | Amino acid | CDS  | gDN  | Instability | Conserved  |
|----------|-------|-----|------------|------|------|-------------|------------|
| Ntab0599 | 25.97 | 8.5 | 230        | 693  | 1333 | 32.12       | 1 Aa_trans |
| Ntab0860 | 87.12 | 6.6 | 798        | 2397 | 1952 | 32.13       | 2 Aa_trans |
| Ntab0931 | 42.78 | 9.5 | 384        | 1155 | 2337 | 27.63       | 1 Aa_trans |

Table S3 Identities on amino acid sequence and their coding sequence between the fifteen members of *N. Tabacum*.

|                            |             | Amino acid identity 69.96% |          |          |          |          |          |          |          |          |          |          |          |          |          |          |
|----------------------------|-------------|----------------------------|----------|----------|----------|----------|----------|----------|----------|----------|----------|----------|----------|----------|----------|----------|
|                            |             | Ntab047                    | Ntab0186 | Ntab0484 | Ntab0049 | Ntab0126 | Ntab0889 | Ntab0329 | Ntab0800 | Ntab0821 | Ntab0126 | Ntab0759 | Ntab0648 | Ntab0439 | Ntab0331 | Ntab0927 |
|                            |             | 5230                       | 340      | 720      | 050      | 970      | 300      | 990      | 540      | 150      | 360      | 460      | 520      | 400      | 750      | 350      |
| Nucleotide identity 71.04% | Ntab0475230 |                            | 100      | 98.33    | 98.33    | 86.16    | 86.16    | 85.95    | 63.48    | 63.55    | 57.49    | 58.84    | 54.43    | 56.21    | 56.76    | 57.14    |
|                            | Ntab0186340 | 100                        |          | 98.33    | 98.33    | 86.16    | 86.16    | 85.95    | 63.48    | 63.55    | 57.49    | 58.84    | 54.43    | 56.21    | 56.76    | 57.14    |
|                            | Ntab0484720 | 97.37                      | 97.37    |          | 100      | 86.1     | 86.1     | 85.89    | 64.45    | 63.94    | 58.48    | 59.46    | 54.56    | 56.85    | 56.99    | 57.38    |
|                            | Ntab0049050 | 97.37                      | 97.37    | 100      |          | 86.1     | 86.1     | 85.89    | 64.45    | 63.94    | 58.48    | 59.46    | 54.56    | 56.85    | 56.99    | 57.38    |
|                            | Ntab0126970 | 82.92                      | 82.92    | 82.61    | 82.61    |          | 100      | 99.17    | 64.65    | 64.72    | 56.97    | 58.51    | 53.81    | 55.17    | 57.47    | 57.47    |
|                            | Ntab0889300 | 82.92                      | 82.92    | 82.61    | 82.61    | 100      |          | 99.17    | 64.65    | 64.72    | 56.97    | 58.51    | 53.81    | 55.17    | 57.47    | 57.47    |
|                            | Ntab0329990 | 82.51                      | 82.51    | 82.54    | 82.54    | 96.67    | 96.67    |          | 65.82    | 64.33    | 61.1     | 63.55    | 58.57    | 54.88    | 57.26    | 57.26    |
|                            | Ntab0800540 | 64.16                      | 64.16    | 63.64    | 63.64    | 64.57    | 64.57    | 63.92    |          | 94.42    | 55.95    | 57.96    | 53.42    | 56.13    | 54.78    | 54.97    |
|                            | Ntab0821150 | 63.9                       | 63.9     | 63.32    | 63.32    | 64.33    | 64.33    | 63.88    | 93.76    |          | 55.26    | 57.4     | 53.32    | 55.51    | 55.51    | 55.8     |
|                            | Ntab0126360 | 60.78                      | 60.78    | 60.49    | 60.49    | 60.54    | 60.54    | 56.77    | 50.47    | 50.93    |          | 93.01    | 72.42    | 77.38    | 63.87    | 64.27    |
|                            | Ntab0759460 | 63.49                      | 63.49    | 62.93    | 62.93    | 62.77    | 62.77    | 58.51    | 52.13    | 52.13    | 91.43    |          | 76.57    | 79.02    | 65.28    | 65.49    |
|                            | Ntab0648520 | 57.87                      | 57.87    | 59.16    | 59.16    | 58.3     | 58.3     | 53.81    | 47.87    | 47.97    | 72.87    | 77.52    |          | 88.91    | 63.13    | 62.92    |
|                            | Ntab0439400 | 60.78                      | 60.78    | 62.04    | 62.04    | 60.27    | 60.27    | 60.32    | 51.05    | 50.95    | 78.94    | 79.95    | 88.25    |          | 63.66    | 64.27    |
|                            | Ntab0331750 | 60.1                       | 60.1     | 60.83    | 60.83    | 61.08    | 61.08    | 61.84    | 49.41    | 50.1     | 63.68    | 65.56    | 62.44    | 65.57    |          | 97.25    |
|                            | Ntab0927350 | 61.2                       | 61.2     | 61.74    | 61.74    | 62.18    | 62.18    | 62.11    | 50.29    | 50.97    | 64.74    | 66.6     | 62.79    | 66.12    | 96.19    |          |

Table S4 Putative conserved motif in the amino acid sequence of the 15 NtAAP sequence

| Motif | Width | Best position match                                                                                                                                                                                                                                                                                          |
|-------|-------|--------------------------------------------------------------------------------------------------------------------------------------------------------------------------------------------------------------------------------------------------------------------------------------------------------------|
| 1     | 119   | <p><b>GPRNYTYMEAVK</b><b>GILGGKKVKVCGLIQYLN</b><b>LF</b><b>GV</b></p> <p><b>AIGYTIAASV</b><b>SMLAIKRSNCFHRNHRRDPCH</b><b>MSSNG</b></p> <p><b>YMIAFGVTEILFSQIPGFDQV</b><b>WWLSIVA</b><b>AIMSFTYST</b></p> <p><b>VGLVLGIAK</b><b>VAG</b></p> <p><b>EIQDTIKSPPAEH</b><b>KTMKKASMLSIGVTTIF</b><b>YLLCGCI</b></p> |
| 2     | 115   | <p><b>GYAAFGNDAPGNLLTGFGFFDPY</b><b>WLLDIANA</b><b>AIVIH</b></p> <p><b>LVGAYQVYCQPLFAFVEK</b><b>WSAKKWSKSNFV</b><b>TAEH</b></p> <p><b>DIPIPFV</b><b>G</b></p> <p><b>NLQTNYSKCFDDDGHLRRTGTFWTT</b><b>SHITAVIGS</b></p>                                                                                        |
| 3     | 79    | <p><b>GVLSLAWAIGQLGWVAGPTVMILFAFV</b><b>VLYTSNLL</b></p> <p><b>SQCYRTGD</b></p> <p><b>NFFRVIWRTIFVILTTI</b><b>AMLLPFFNDVV</b><b>GLLGALGF</b></p>                                                                                                                                                             |
| 4     | 79    | <p><b>WPLTVYFPIEM</b><b>YIKQKKIGRWTN</b><b>QWIGLEMLS</b><b>AAC</b></p>                                                                                                                                                                                                                                       |

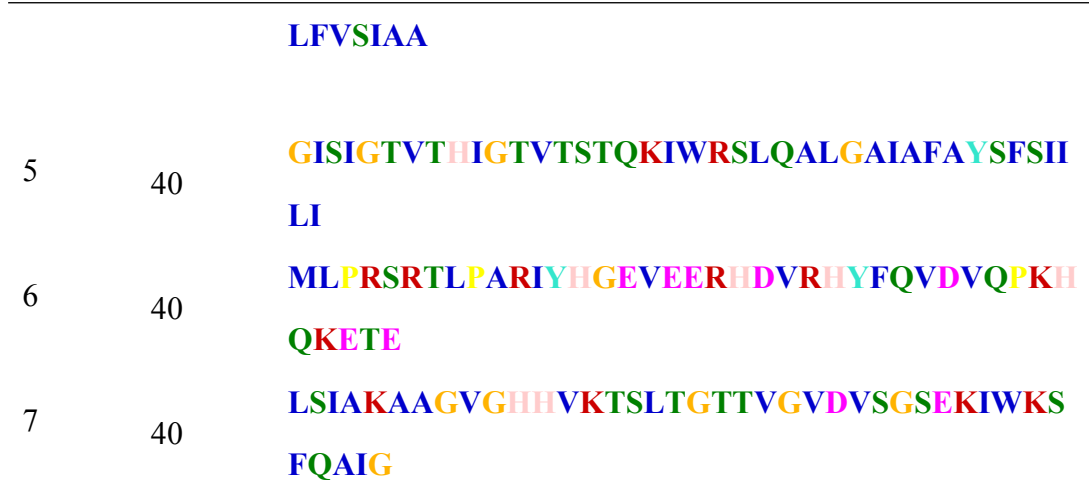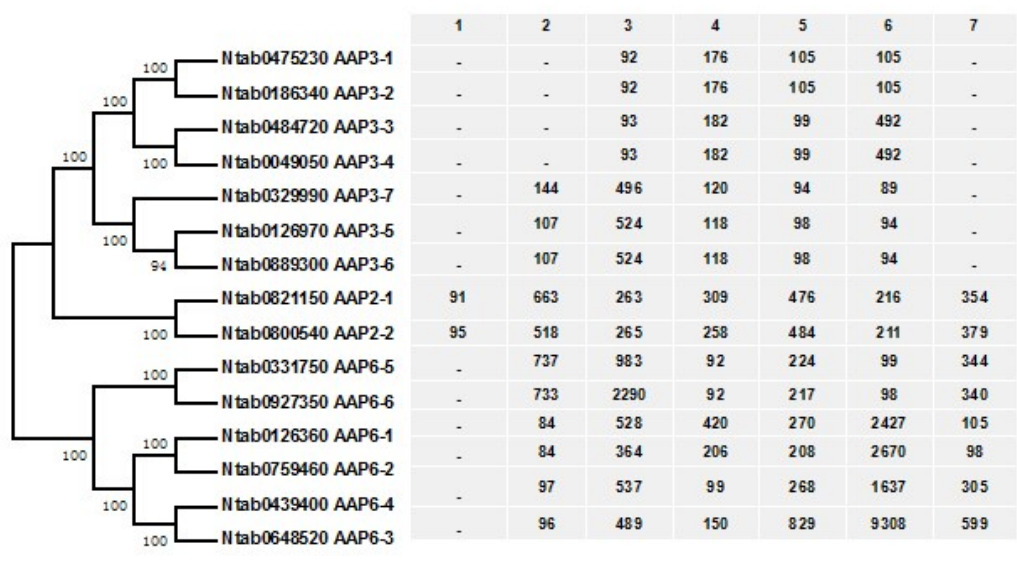

Fig.S 1 Schematic presentation of size and positions of the conservation of intron

numbers of *AAP* genes from *N. tabacum*.

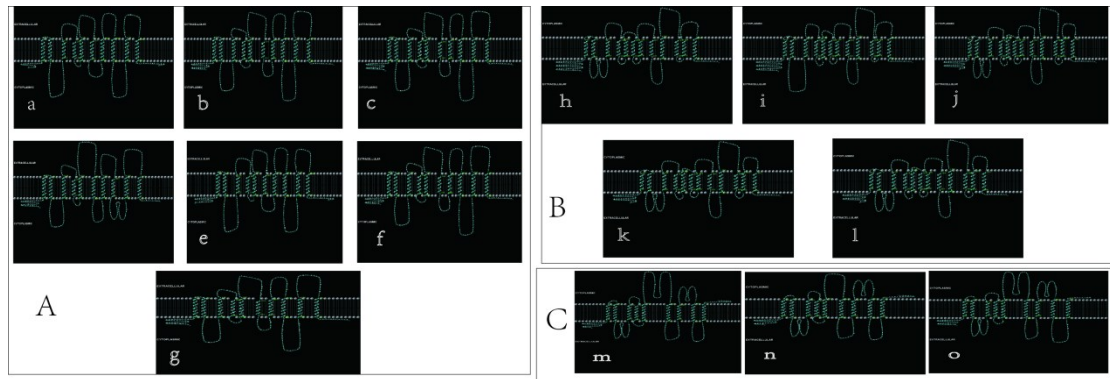

Fig.S 2 The hydrophobic transmembrane domain of *NtAAP* genes. A present N/C terminals are all in cytoplasmic and contains 10 TMs, a-g is NtAAP6-5、NtAAP3-3、NtAAP3-2、NtAAP6-1、NtAAP6-6、NtAAP3-4、NtAAP3-1 respectively; B present N/C terminals are all in extracellular and contains 12 TMs, h-l is NtAAP2-1、NtAAP2-2、NtAAP3-5、NtAAP3-6、NtAAP3-7; N/C-terminal are in extracellular and cytoplasmic, respectively, containing 9 TMs, m-o is NtAAP6-3、NtAAP6-4、NtAAP6-2 respectively.

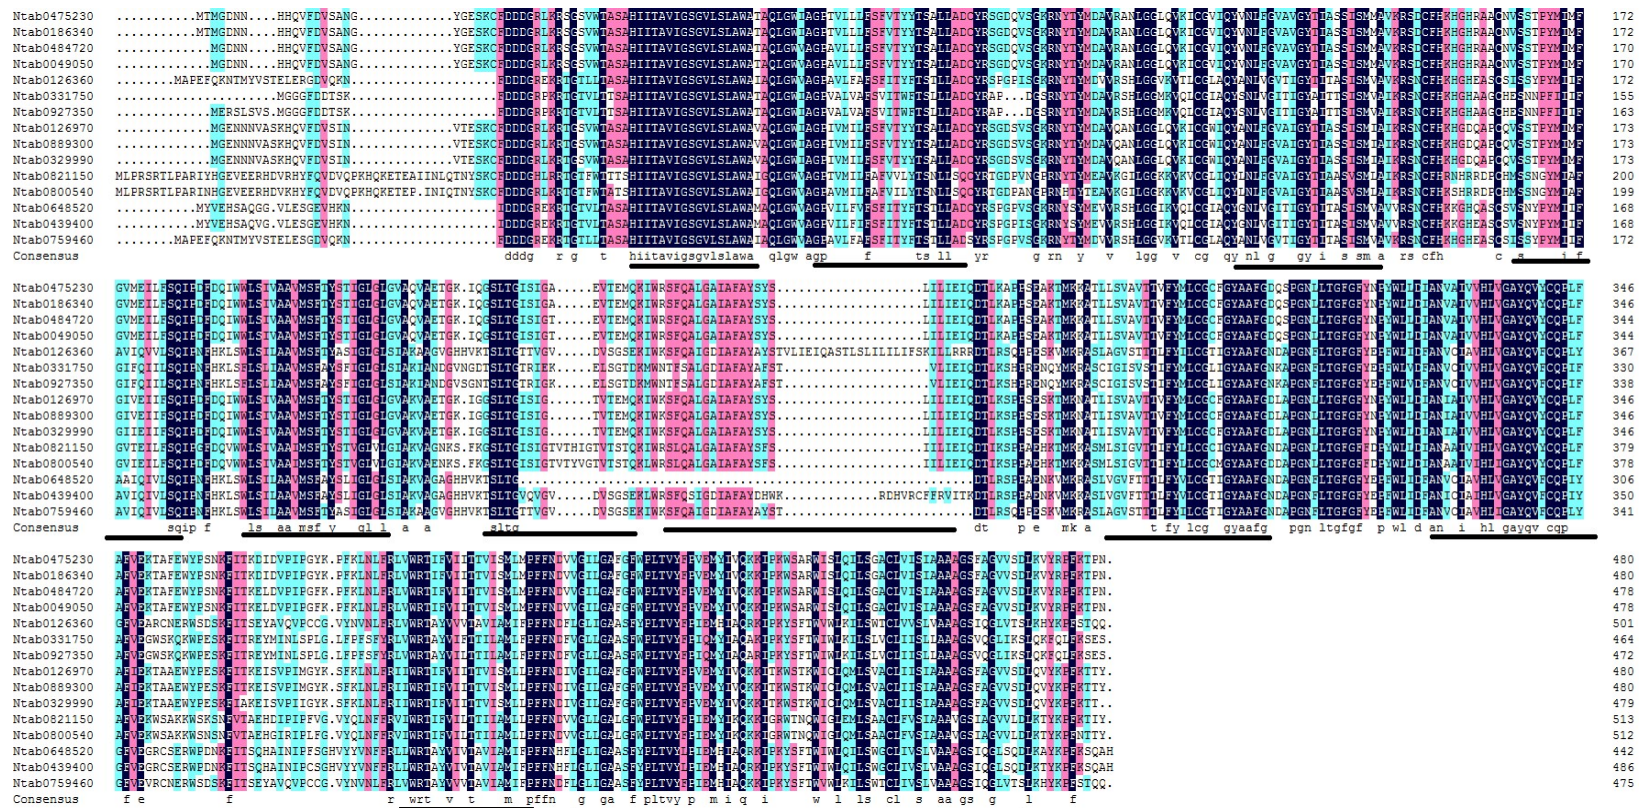

Fig. S3 Multiple alignment of the NtAAP protein sequences in *N. tabaccum* by DNAMAN. The black underline areas represented the transmembrane regions.



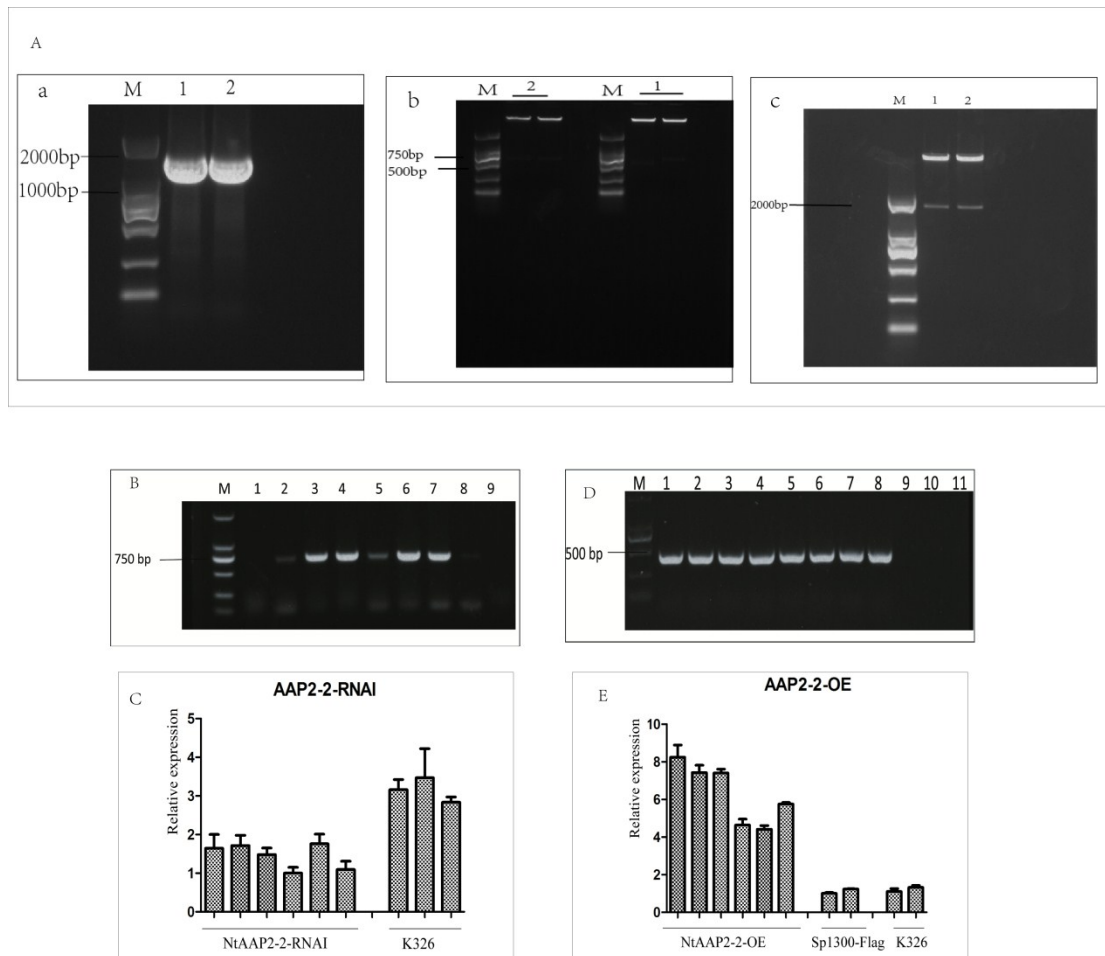

Fig. S4 Clone and molecular analyses of *NtAAP2* transgenic lines and wild-type (K326). A: a, clone of *NtAAP2* gene in *Nicotiana tabacum*; b, the digestion of *NtAAP2-2-RNAi* vector plasmid with *Xho*I and *Xba*I respectively; c, the digestion of *NtAAP2-2-OE* vector plasmid with *Spe*I and *Kpn*I. Lane M, DL Marker 2000; B: Confirmation of the positive *NtAAP2-RNAi* transgenic lines via amplification of the kanamycin-resistance gene by PCR. Lane M, DL Marker 2000; Lane 3-7, positive lines; Lane 8-9, wild type. C: Expression level of *NtAAP2* gene in *NtAAP2-RNAi* transgenic lines by qPCR. D: Confirmation of the positive *NtAAP2-RNAi* transgenic lines via amplification of the *NtAAP2-2* gene flanking primers by PCR. Lane M, DL Marker 2000; Lane 1-8, positive lines; Lane 9-11, wild type. E: Expression level of *NtAAP2* gene in *NtAAP2-OE* transgenic lines by qPCR.
